# Supplementary material for: Molecular modeling studies of quinazolinone derivatives as novel PI3Kδ selective inhibitors
Source: Royal Society of Chemistry journal article supplement (doi:10.1039/c7ra10870b), 2017-01-01
Supplement: c7ra10870b1.pdf [file c7ra10870b1.pdf]

## Supplementary material

# Molecular Modeling Studies of Quinazolinone Derivatives as Novel PI3K $\delta$

## Selective Inhibitors

Xiu Xiu Peng, Kai Rui Feng, Yu Jie Ren\*

\*School of Chemical and Environmental Engineering, Shanghai Institute of Technology, Shanghai 201418, China

E-mail: clab@sit.edu.cn

**Table 1S.** Analysis of critical amino acid residues for PI3K $\delta$  complexes deposited in protein databank database

| PDB                  | 4XE0                                                                              | 2X38                                                                              | 5I4U                                                                              | 5T8I                                                                                | 5T7F                                                                                |
|----------------------|-----------------------------------------------------------------------------------|-----------------------------------------------------------------------------------|-----------------------------------------------------------------------------------|-------------------------------------------------------------------------------------|-------------------------------------------------------------------------------------|
| Resolution           | 2.43 Å                                                                            | 2.20 Å                                                                            | 2.37 Å                                                                            | 2.60 Å                                                                              | 2.60 Å                                                                              |
| Ligand               | 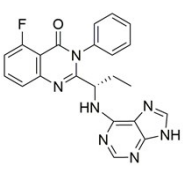 |  |  |  |  |
| Released date        | 2015-02-04                                                                        | 2010-02-02                                                                        | 2017-02-22                                                                        | 2016-12-18                                                                          | 2016-12-18                                                                          |
| Interception residue | LYS708                                                                            | LYS708                                                                            |                                                                                   |                                                                                     |                                                                                     |
|                      | THR750                                                                            | THR750                                                                            | THR750                                                                            | THR750                                                                              | THR750                                                                              |
|                      | MET752                                                                            | MET752                                                                            | MET752                                                                            | MET752                                                                              | MET752                                                                              |
|                      | PRO758                                                                            | PRO758                                                                            | PRO758                                                                            | PRO758                                                                              | PRO758                                                                              |
|                      | TRP760                                                                            | TRP760                                                                            | TRP760                                                                            | TRP760                                                                              | TRP760                                                                              |
|                      | ILE777                                                                            | ILE777                                                                            | ILE777                                                                            | ILE777                                                                              | ILE777                                                                              |
|                      | TYR813                                                                            | TYR813                                                                            | TYR813                                                                            | TYR813                                                                              | TYR813                                                                              |
|                      | ILE825                                                                            | ILE825                                                                            | ILE825                                                                            | ILE825                                                                              | ILE825                                                                              |
|                      | CLU826                                                                            | CLU826                                                                            | CLU826                                                                            | CLU826                                                                              | CLU826                                                                              |
|                      | VAL828                                                                            | VAL828                                                                            | VAL828                                                                            | VAL828                                                                              | VAL828                                                                              |
|                      |                                                                                   |                                                                                   | LEU829                                                                            | LEU829                                                                              | LEU829                                                                              |
|                      | SER831                                                                            | SER831                                                                            | SER831                                                                            | SER831                                                                              | SER831                                                                              |
|                      | ASP832                                                                            | ASP832                                                                            | ASP832                                                                            | ASP832                                                                              | ASP832                                                                              |
|                      | THR833                                                                            | THR833                                                                            | THR833                                                                            | THR833                                                                              | THR833                                                                              |
|                      | ASN836                                                                            | ASN836                                                                            |                                                                                   | ASN836                                                                              |                                                                                     |
|                      | ASP897                                                                            |                                                                                   | ASP897                                                                            | ASP897                                                                              | ASP897                                                                              |
|                      |                                                                                   |                                                                                   |                                                                                   | ASN898                                                                              | ASN898                                                                              |
|                      | MET900                                                                            | MET900                                                                            | MET900                                                                            | MET900                                                                              | MET900                                                                              |
|                      | ILE910                                                                            | ILE910                                                                            | ILE910                                                                            | ILE910                                                                              | ILE910                                                                              |
|                      | ASP911                                                                            | ASP911                                                                            | ASP911                                                                            | ASP911                                                                              | ASP911                                                                              |

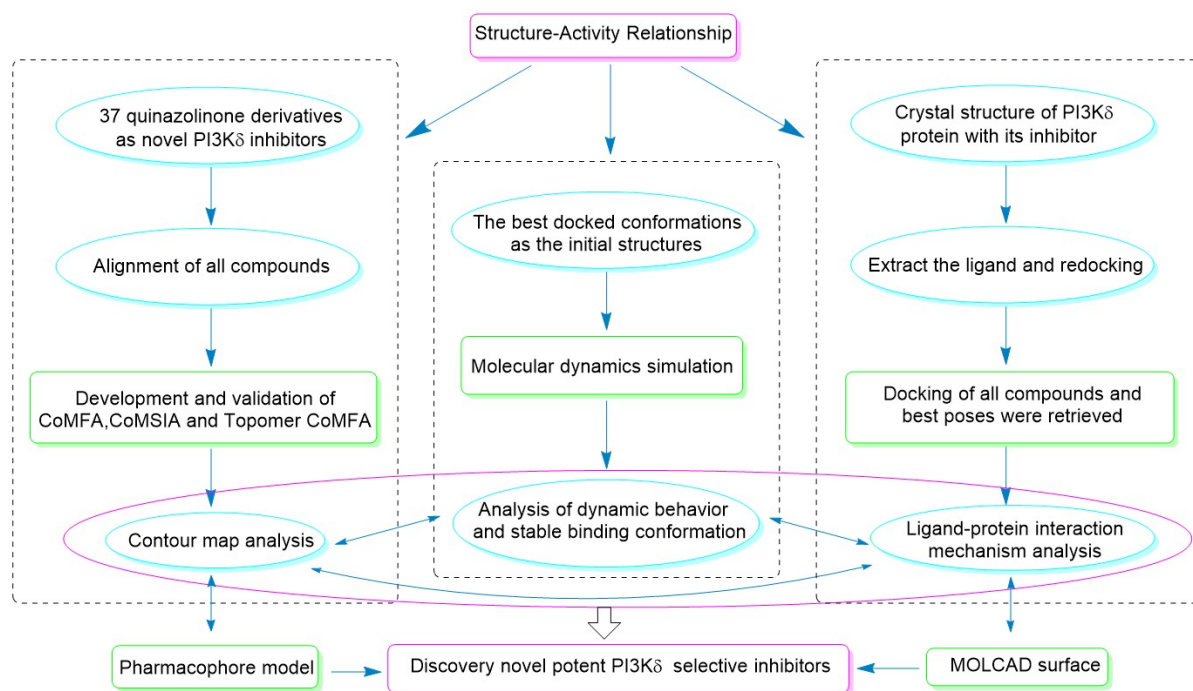

**Fig. 1S** Flowchart for the application of the 3D-QSAR model, Molecular docking studies, pharmacophore model and MD simulations.

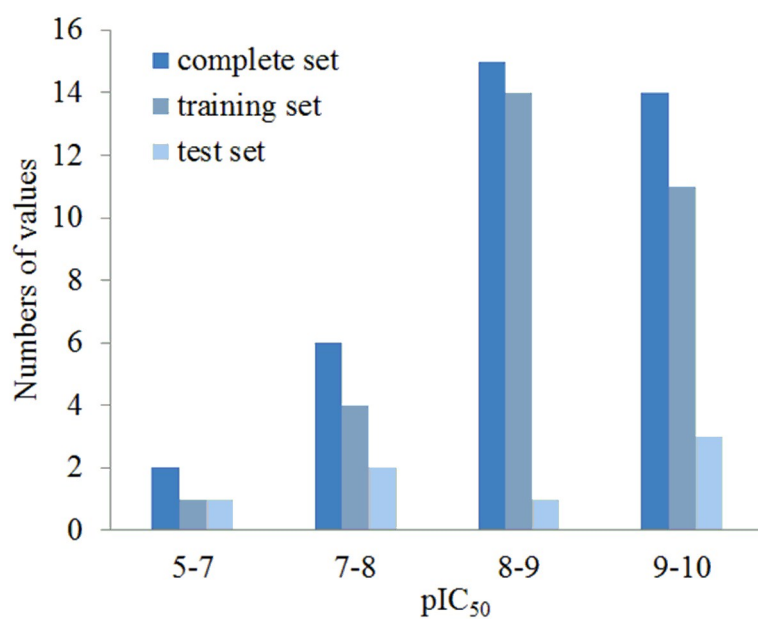

**Fig. 2S** Distribution of the inhibitory activity of all the compounds.

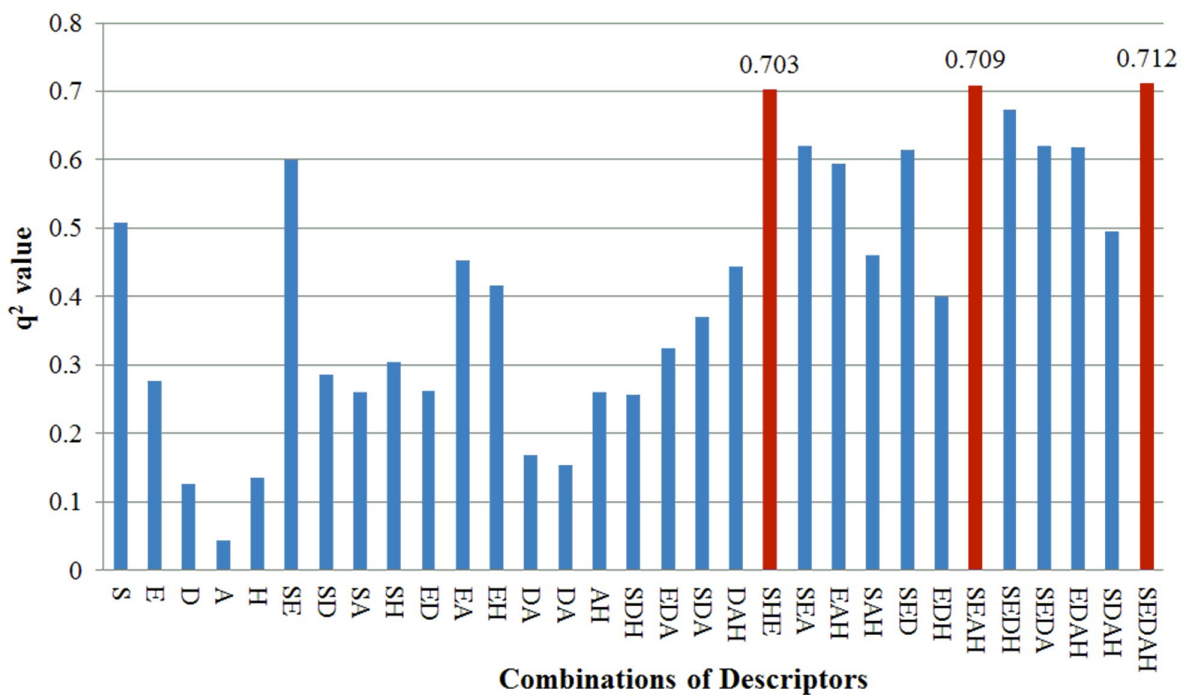

**Fig. 3S** Graph of the 31 possible CoMSIA descriptor combinations with their respective  $q^2$  values.

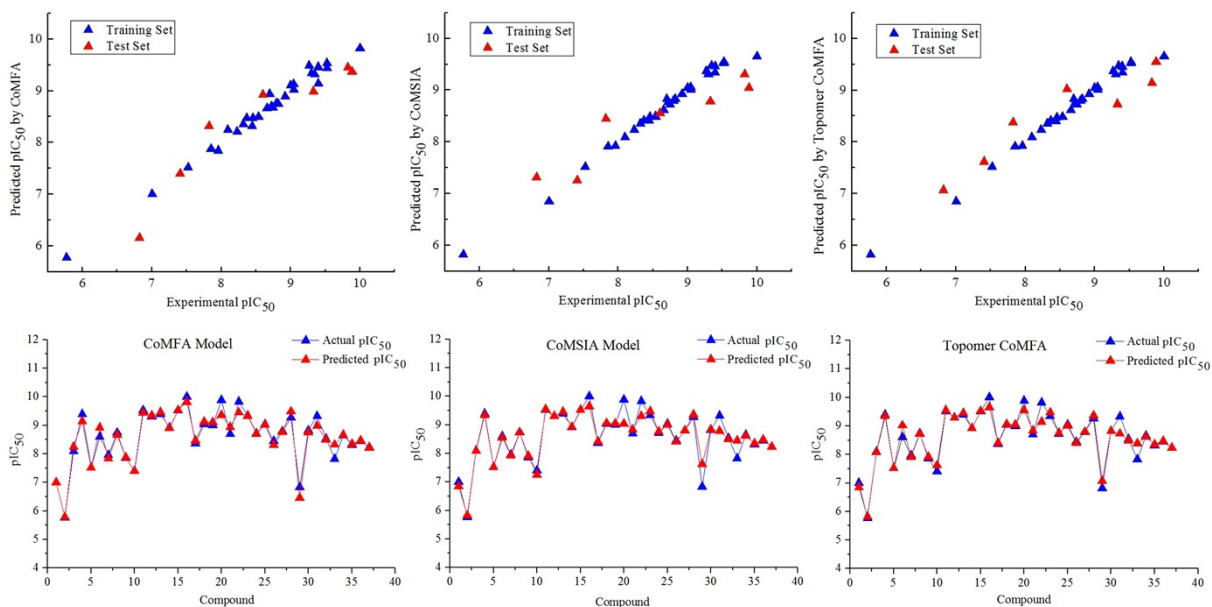

**Fig. 4S** The correlation plots of experimental and predicted  $pIC_{50}$  values for the total set in the CoMFA, CoMSIA and Topomer CoMFA models.

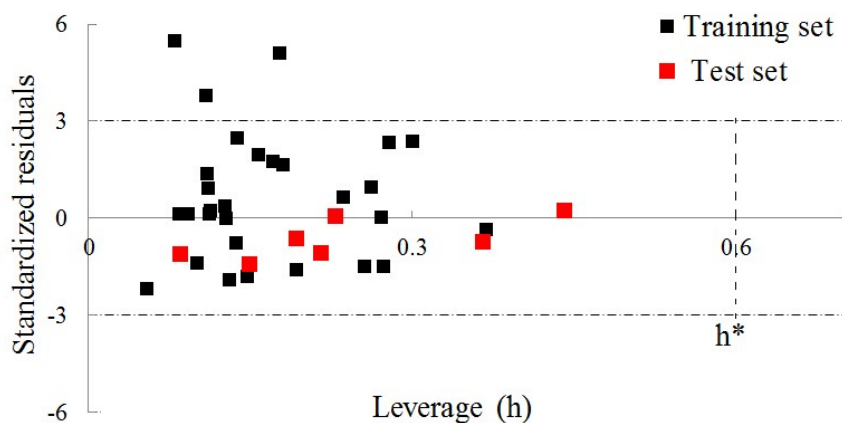

Fig. 5S William's plot (standardized residuals versus leverages) of CoMSIA model.

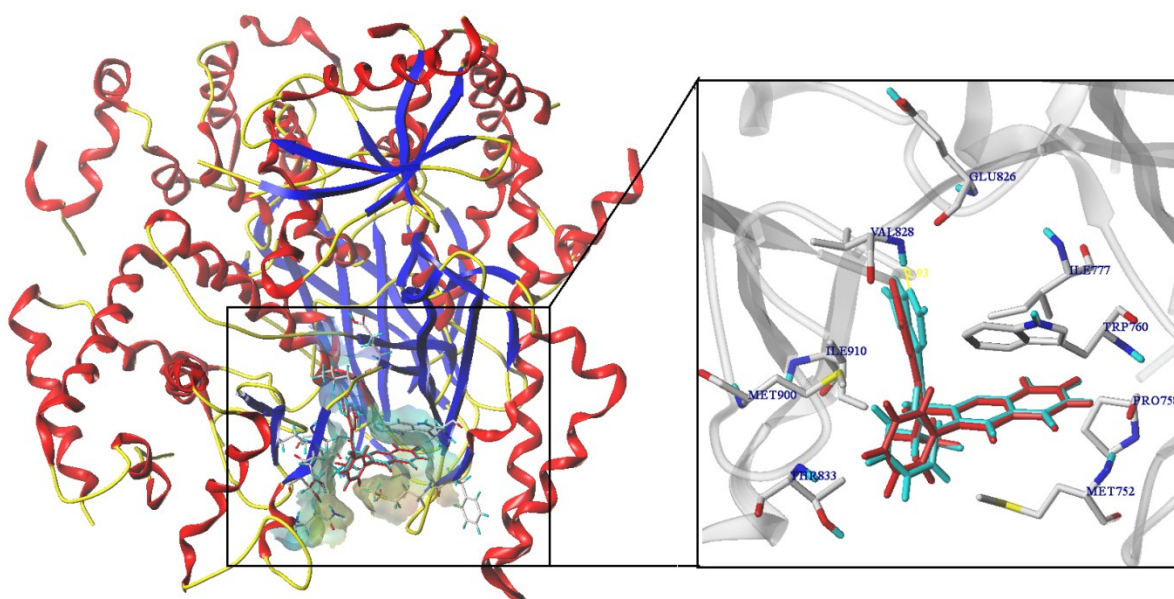

Fig. 6S Re-docking results of the original ligand in the binding site of PI3K $\delta$  protein.

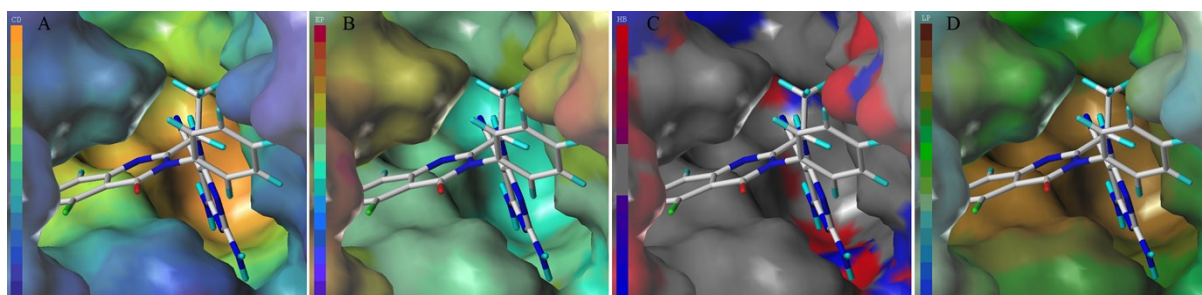

Fig. 7S Active site MOLCAD surface with the compound **16** representation Cavity Depth (A), Electrostatic potential (B), Hydrogen bonding ability (C) and Lipophilic Potential (D).

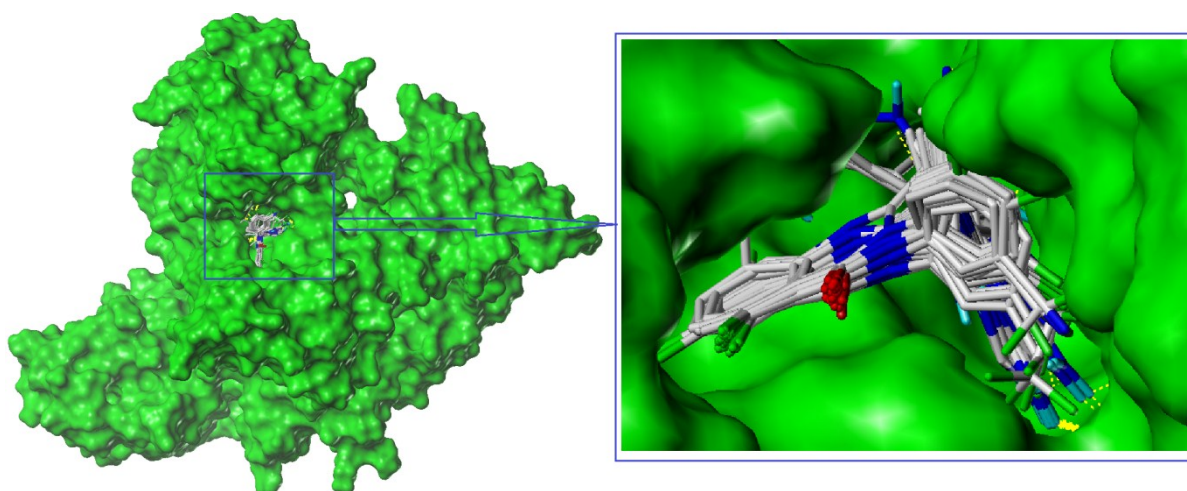

**Fig. 8S** Docking results of all the compounds in the study and surface of the binding site (4XE0).

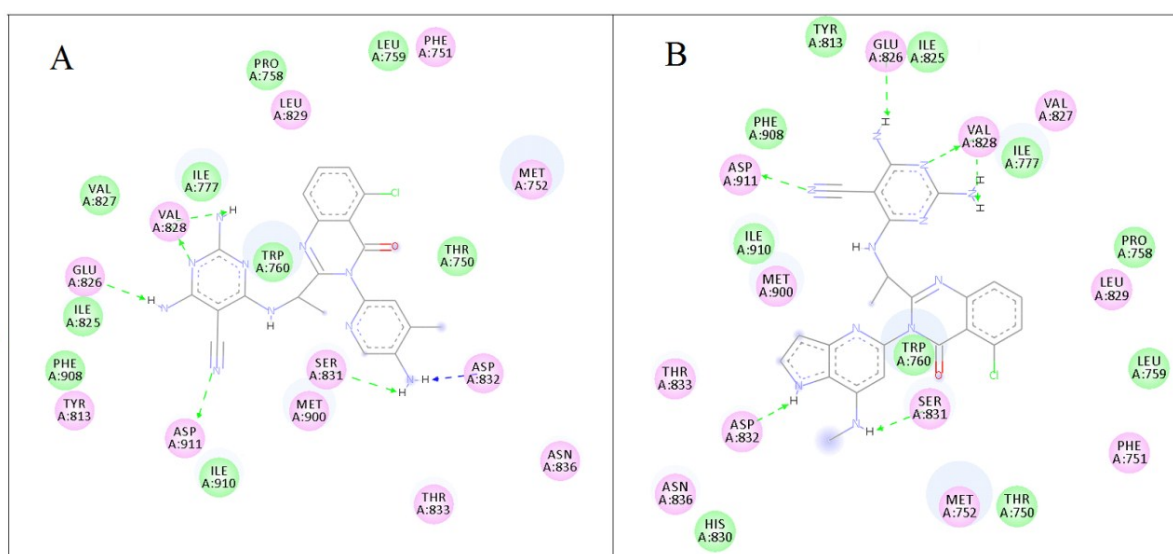

**Fig. 9S** 2D interaction map of newly designed compound **D04** (A) and **D06** (B) with PI3K $\delta$  protein.

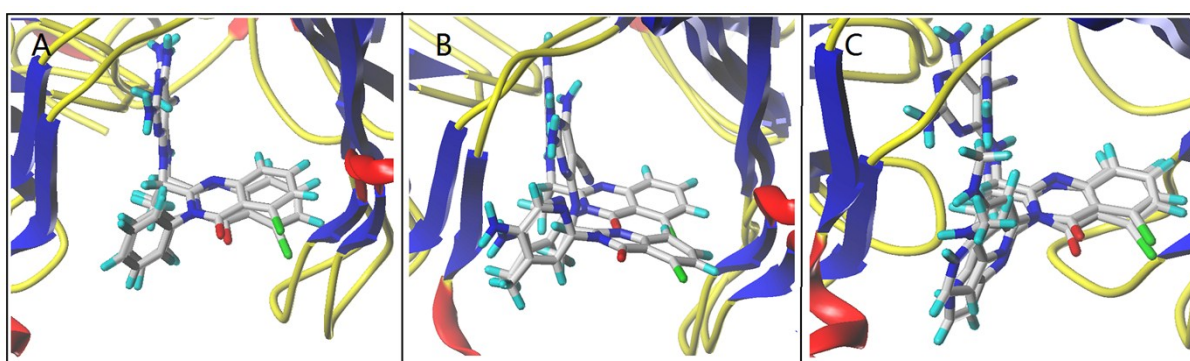

**Fig. 10S** Structural comparison between initial and representative snapshots from MD of compound **16** (A), **D04** (B) and **D06** (C).

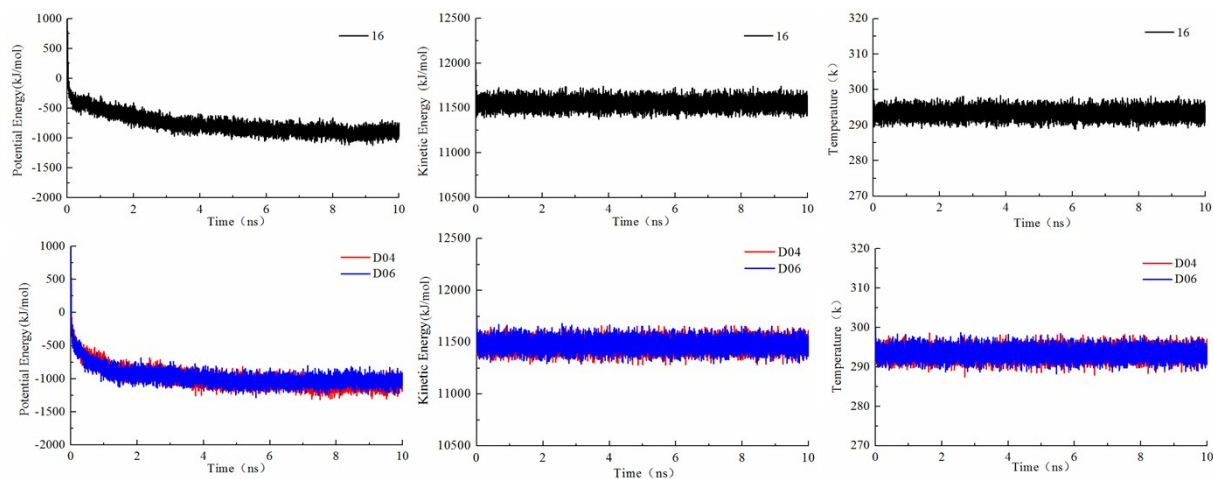

**Fig. 11S** Change in potential energy, kinetic energy and temperature of compound **16**, **D04** and **D06** with respect to simulation time.

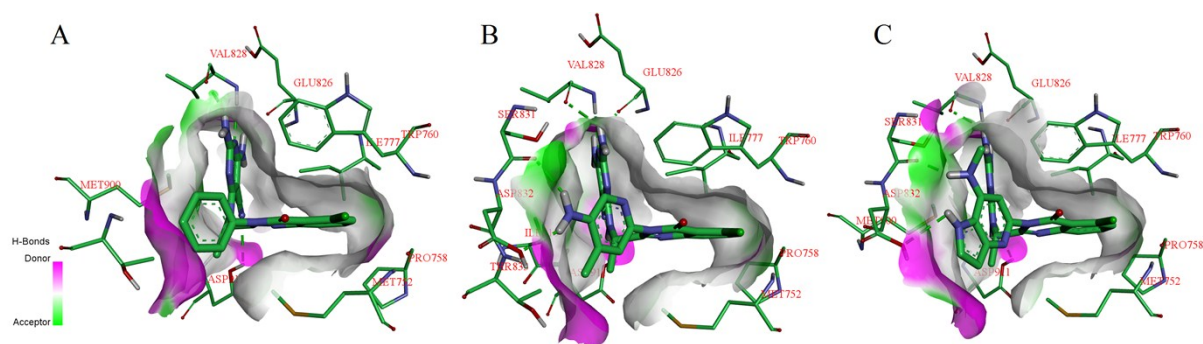

**Fig. 12S** The binding mode and H-bond surface determined via MD analysis: **4XE0-16** (A), **4XE0-D04** (B), **4XE0-D06** (C).
